# Supplementary material
Source: PubMed Central journal article supplement (PMC3877811)
Supplement: supp_tpc.113.117648_tpc117648Supplemental.pdf [file supp_tpc.113.117648_tpc117648Supplemental.pdf]

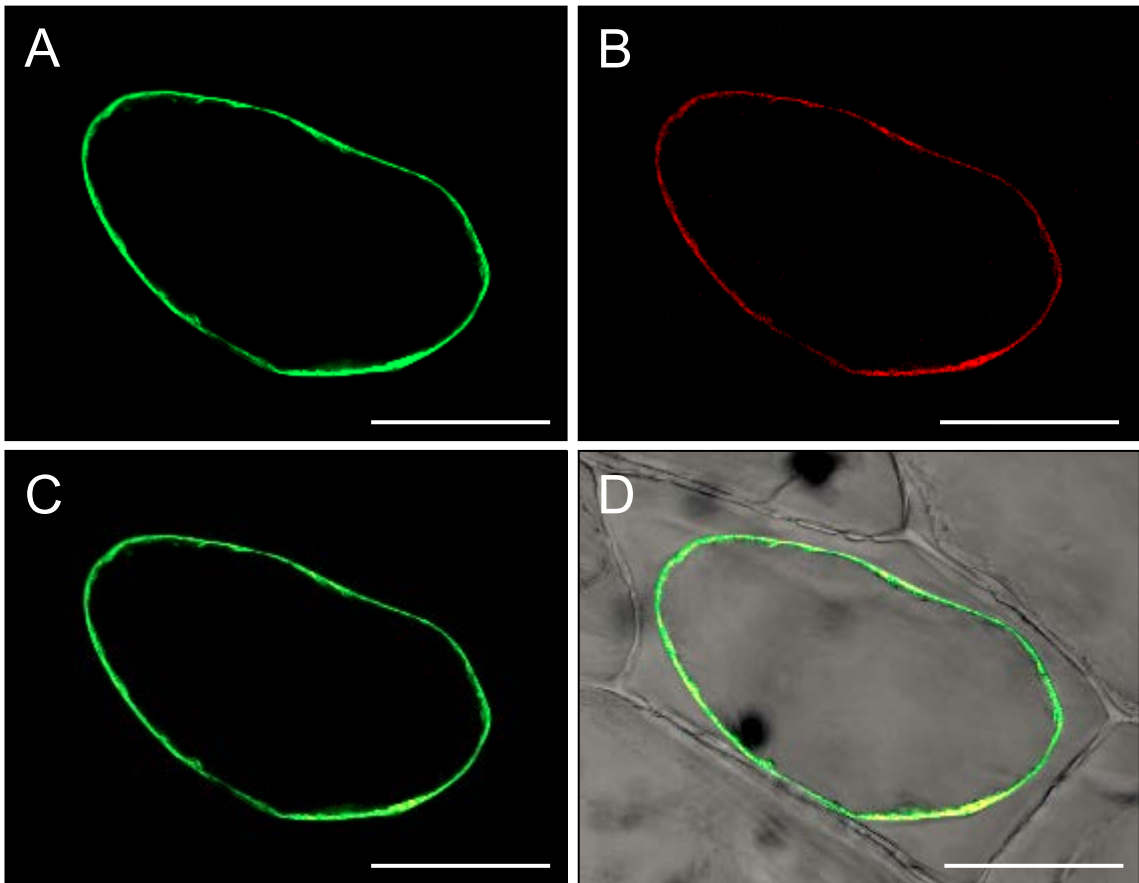

**Supplemental Figure 1.** Localization of Pp-ABCG7 fused to an RFP marker protein using confocal scanning laser microscopy, following transient expression in onion epidermal cells. (A) Plasma membrane marker AtPIP2A-GFP. (B) PpABCG7-RFP. (C) Merged fluorescence signal. (D) Merged signal overlaid onto a brightfield image. Scale bars = 75 μm.

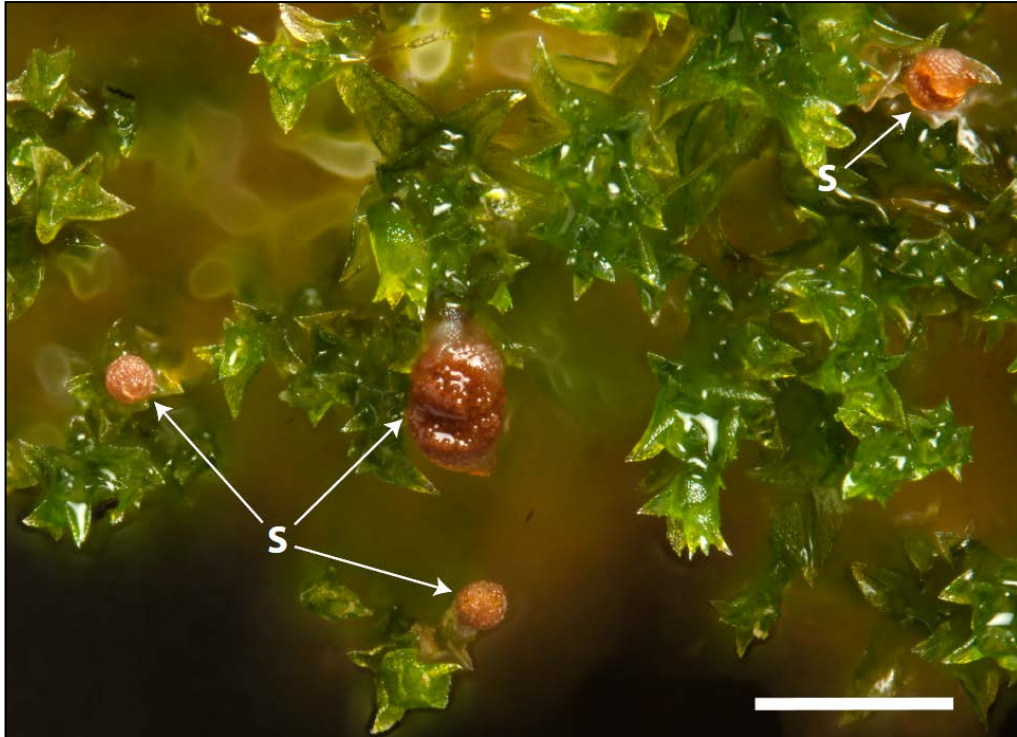

**Supplemental Figure 2.** Abnormal sporophyte phenotype of *Δppabcg7*. Stunted and/or shriveled sporophytes (S) are indicated by arrows. Scale bar = 1 mm.

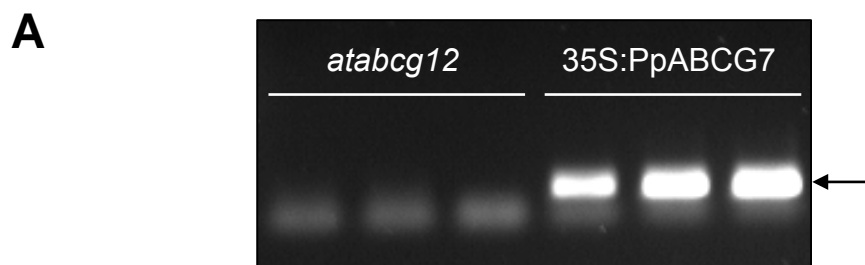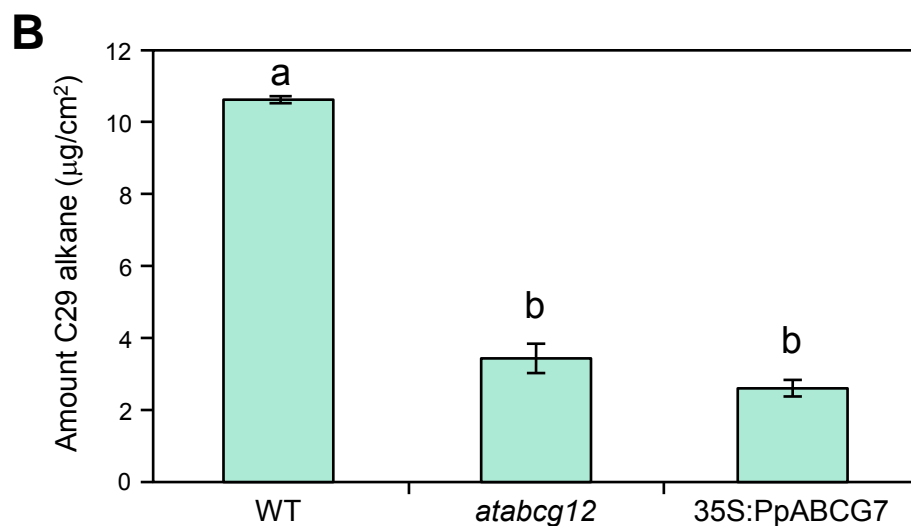

**Supplemental Figure 3.** Over-expression of *Pp-ABCG7* in the *Arabidopsis atabcg12* mutant. (A) RT-PCR analysis of cDNA from non-transformed (*atabcg12*) and transformed (35S:PpABCG7) plants, evaluating the expression of *PpABCG7* (the diagnostic 198 bp fragment is indicated with an arrow). Three separate lines are shown for each genotype. (B) Levels of the C<sub>29</sub> alkane wax component on the stem surface of wild type (WT) plants and those of the *atabcg12* mutant and the mutant expressing *PpABCG7* (35S:PpABCG7). Statistical analysis involved three pairwise Student t-tests, (P < 0.001) with three biological replicates.

**Supplemental Table 1.** List of PCR primers, referenced in the Methods section.

| <b>Primer Name</b>             | <b>Sequence 5' to 3'</b>       |
|--------------------------------|--------------------------------|
| <b>A<sub>F</sub></b>           | CAGGACAAGTTCTGCTCAACG          |
| <b>A<sub>R</sub></b>           | GCAAGAAGTGATCCGAGGG            |
| <b>B<sub>F</sub></b>           | CTGGACGCATCGTTAGTCGAG          |
| <b>B<sub>R</sub></b>           | GTCGACCCATGTCAGGCG             |
| <b>C<sub>F</sub></b>           | CAAGCTGAGGGAGAATCTGGG          |
| <b>C<sub>R</sub></b>           | CGTATTTGTAAATTCCCCTATGTTT      |
| <b>D<sub>R</sub></b>           | TACCCTTTGTTGAAAAGTGTCAA        |
| <b>E<sub>F</sub></b>           | AGGAGGAAGACAAGGAAGGATAAGGTTGCA |
| <b>PpABCG7-5FR<sub>F</sub></b> | GTGTTAAGCTTCATCAGGCTGGTG       |
| <b>PpABCG7-5FR<sub>R</sub></b> | GCTCCGAATTCACCTCTACAGC         |
| <b>PpABCG7-3FR<sub>F</sub></b> | GACCTGGATCCACAATCTACCATTCTG    |
| <b>PpABCG7-3FR<sub>R</sub></b> | CAAACGAGCTCTATGCAGCAATGACC     |
| <b>PpABCG7-3<sub>F</sub></b>   | CGCAACACGACTCCGTC              |
| <b>PpABCG7-3<sub>R</sub></b>   | CCAGGCTCAAGATCAGAATTG          |
| <b>PpABCG7-S<sub>F</sub></b>   | TCCAAGCAAGCCATTCTGCAAGG        |
| <b>PpABCG7-S<sub>R</sub></b>   | CGCAGCAGTTCCGTACGACAGAG        |
| <b>PpACT2<sub>F</sub></b>      | GCGAAGAGCGAGTATGACGAG          |
| <b>PpACT2<sub>R</sub></b>      | AGCCACGAATCTAACTTGTGATG        |
